# Supplementary material for: Transcriptomic profiling in muscle and adipose tissue identifies genes related to growth and lipid deposition
Source: PLoS One. 2017 Sep 6;12(9):e0184120. doi: 10.1371/journal.pone.0184120 (PMC5587268; doi:10.1371/journal.pone.0184120)
Supplement: S7 Table — (XLSX) [file pone.0184120.s024.xlsx]

## Sheet: Sheet1
S7 Table. DEGs related to lipid synthesis, transport and metabolism
KEGG_Pathway	A.up	A.down	M.up	M.down
Fatty acid biosynthesis	ACACA		OXSM	ACSL4
Fatty acid elongation	ACOT1	PTPLA	MECR	PTPLA
Fatty acid degradation	ADH7,WZSP008467	ACAA1,PECI	CPT1B,WZSP008467	ACSL4,EHHADH
Glycerolipid metabolism	GPAM,PNPLA3	AGPAT2	LCLAT1,PNPLA3,AKR1B1	DGKA
Glycerophospholipid metabolism	GPAM	AGPAT2	LCLAT1,PLA2G6	GPD2,DGKA,PTDSS1
Ether lipid metabolism			PLA2G6	AGPS
Sphingolipid metabolism	SPHK1		SMPD1,SPHK1,NEU1,GALC,LASS6	SGPL1,SGMS2,GBA
Glycosphingolipid biosynthesis - ganglio series			ST8SIA5	ST6GALNAC4
Biosynthesis of unsaturated fatty acids	ACOT1	PTPLA,ACAA1	SCD	PTPLA
Fatty acid metabolism	ACACA	PTPLA,ACAA1	CPT1B,MECR,OXSM,SCD	ACSL4,EHHADH,PTPLA
Sphingolipid signaling pathway	NOS3,SPHK1,BDKRB2,FCER1G,BID	MAPK10	TRADD,SMPD1,SPHK1,TP53,BAX,LASS6,GAB2	PPP2R3A,MAPK9,PIK3R3,KRAS,SGPL1,AKT3,SGMS2
Pyruvate metabolism	ACACA,PDHB,ME3,ACSS1,LDHA,ACSS2,ME1		LDHD,GRHPR,ME3
Insulin signaling pathway	ACACA,PRKAA2,HK3,HK1	MAPK10,CALML6	FOXO1,SLC2A4,PRKAG2,PPARGC1A,HK2,PTPN1	PRKAA2,PRKACB,PRKCI,MAPK9,PIK3R3,KRAS,AKT3,PRKAR2A,PHKA1,PRKAB2,GSK3B
Adipocytokine signaling pathway	PRKAA2,LEP,TNFRSF1B,CAMKK1	MAPK10	TRADD,NFKBIA,CPT1B,SLC2A4,PRKAG2,PPARGC1A	PRKAA2,ACSL4,MAPK9,AKT3,PTPN11,PRKAB2
Regulation of lipolysis in adipocytes		ABHD5		PRKACB,PIK3R3,AKT3
Fat digestion and absorption		CLPS,AGPAT2
Note: Upregulation denotes the genes highly expressed in the indigenous breeds and downregulation denotes the genes highly expressed in the Yorkshire breed.
